# Kinetics and topology of DNA associated with circulating extracellular vesicles released during exercise

Elmo W. I. Neuberger<sup>1\*</sup>, Barlo Hillen<sup>1</sup>, Katharina Mayr<sup>2</sup>, Perikles Simon<sup>1</sup>, Eva-Maria Krämer-Albers<sup>2</sup>, and Alexandra Brahmer<sup>1,2,\*</sup>

<sup>1</sup> Department of Sports Medicine, Rehabilitation and Disease Prevention, Johannes Gutenberg University Mainz, Mainz, Germany; [simonpe@uni-mainz.de](mailto:simonpe@uni-mainz.de)

<sup>2</sup> Institute of Developmental Biology and Neurobiology, Extracellular Vesicles Research Group, Johannes Gutenberg University Mainz, Mainz, Germany; [alberse@uni-mainz.de](mailto:alberse@uni-mainz.de)

\* Correspondence: [albrahme@uni-mainz.de](mailto:albrahme@uni-mainz.de), [neuberger@uni-mainz.de](mailto:neuberger@uni-mainz.de)

## Abstract:

Although it is widely accepted that cancer derived extracellular vesicles (EVs) carry DNA cargo, the association of cell-free circulating DNA (cfDNA) and EVs in plasma of healthy humans remains elusive. Using a physiological exercise model, where EVs and cfDNA are synchronously released, we aimed to characterize the kinetics and localization of DNA associated with EVs. EVs were separated from human plasma using size exclusion chromatography or immuno-affinity capture for CD9<sup>+</sup>, CD63<sup>+</sup>, and CD81<sup>+</sup> EVs. DNA was quantified with an ultra-sensitive qPCR assay targeting repetitive LINE elements, with or without DNase digestion. This model shows that a minute part of circulating cell-free DNA is associated with EVs. During rest and following exercise, only 0.12 % of the total cfDNA occurs in association with CD9<sup>+</sup>/CD63<sup>+</sup>/CD81<sup>+</sup>EVs. DNase digestion experiments indicate that the largest part of EV associated DNA is sensitive to DNase digestion and only ~20 % are protected within the lumen of the separated EVs. A single bout of running or cycling exercise increases the levels of EVs, cfDNA, and EV associated DNA. While EV surface DNA is increasing, DNase-resistant DNA remains at resting levels, indicating that EVs released during exercise (ExerVs) do not contain DNA. Consequently, DNA is largely associated with the outer surface of circulating EVs. ExerVs recruit cfDNA to their corona, but do not carry DNA in their lumen.

**Keywords:** extracellular vesicles, exosomes, cell-free DNA, extracellular DNA, corona, intraluminal, physical exercise, vesicular genomic DNA, human plasma

## 1. Introduction

All cells of the human body are constantly and actively releasing a large amount of molecular material into the extracellular space. Directly or indirectly those extracellular molecules can interact in signaling pathways having crucial roles in the development of homeostasis and the coordination of physiological processes [1]. Acute physical exercise is a relevant stressor to disrupt homeostasis and trigger the release of a plethora of molecules into the circulation. A single bout of exercise affects thousands of molecules which orchestrate biological processes including energy metabolism, oxidative stress, inflammation, growth factor response, as well as other regulatory pathways [2]. Next to the release of proteins, collectively referred as secretome [3], nucleic acids including DNA [4–6], and RNA [7] are released under resting conditions and increase during exercise [2,8–10]. Circulating cell-free DNA (cfDNA) is mainly released from cells of the hematopoietic lineage, at rest [11,12], and during exercise [13]. cfDNA shows a typical fragmentation pattern, with a peak at ~166 bp representing a stretch of DNA wrapped around a nucleosome connected to histone 1, which protects

45 DNA from nuclease degradation [14]. Additionally, it has been suggested that cfDNA is associated  
46 with EVs to be protected from degradation [1,15].

47 EVs are versatile mediators of cellular communication found in various body fluids, including  
48 blood [16], where their abundance also increases in response to acute physical exercise (termed  
49 ExerVs) [17–19]. In human blood a heterogeneous mixture of EVs is present [20,21]. They can be  
50 classified due to their cellular origin into microvesicles (MVs, 100-1000 nm in size), which shed from  
51 the outer plasma membrane, exosomes (30-100 nm) with endosomal origin, and apoptotic bodies,  
52 which are produced in the process of apoptosis and range between 1-5  $\mu\text{m}$  in diameter, though  
53 smaller vesicles < 1000 nm are also released [16]. EVs compose of a phospholipid bilayer membrane  
54 that enables protected transport of bioactive cargo like proteins, lipids and nucleic acids between cells  
55 and tissues inside the vesicle. Additionally, macromolecules can be attached outside of the EV as part  
56 of the vesicle corona [22,23].

57 Although recent research indicates that nuclear DNA is a cargo of EVs in cancer, the association  
58 of DNA and EVs in healthy plasma is incompletely understood and controversially discussed  
59 (reviewed in [1,15,24]). A number of studies determined the association in cell culture and tumor  
60 models [25–34], as well as human plasma or serum of cancer patients [35–40], and healthy individuals  
61 [26,38,39,41–43]. In studies analyzing serum and plasma, an EV-associated part of the cell-free DNA  
62 of up to 90 % has been reported [36,43], whereas others find only a minor part associated to EVs  
63 [37,41], or no DNA in healthy individuals [39]. These differing observations are likely influenced by  
64 the heterogeneity and the different origin of EVs (cancer patient versus healthy person versus cell  
65 culture), as well as technical disparities of EV isolation and DNA quantification methods.

66 Separation of EVs from cell culture media or blood plasma is commonly performed using  
67 ultracentrifugation (UC) approaches, polymer-based precipitation, size exclusion chromatography  
68 (SEC), or immuno-precipitation for markers which are present on the vesicle membrane (reviewed  
69 in [44]). Isolation by differential UC (dUC), polymer-based precipitation as well as SEC lead to the  
70 co-isolation of high amounts of plasma proteins and lipoproteins [45]. EV preparations that include  
71 density gradient centrifugation using sucrose or iodixanol lead to high purity and further allows a  
72 discrimination of EV subpopulations, but are laborious and require high sample input [46]. A quick  
73 method to separate EVs from plasma with reduced contamination of plasma proteins and  
74 lipoproteins is immuno-affinity capture of EVs using magnetic beads coupled to antibodies for the  
75 tetraspanins CD9, CD63, and CD81 [47]. Still, currently no isolation method exists, that purifies only  
76 one EV subtype free of co-isolated non-EV material (protein aggregates, lipoproteins, etc.), which is  
77 especially important when studying EVs and their cargo and functions in body fluids [45,48].

78 Here, we elucidate the relationship between cfDNA and EVs under physiological conditions and  
79 following physical exercise. We separate EVs from plasma of exercising humans, implementing two  
80 different EV preparation methods including SEC, and immuno-affinity capture for CD9, CD63, and  
81 CD81. Via ultra-sensitive qPCR, directed against the repetitive LINE-1 element, DNA amounts in  
82 plasma, EV-depleted plasma, and isolated EVs are determined. Finally, by using DNase I and  
83 proteinase K digestion we study the amount of DNA, which is associated with the EV surface, or  
84 enclosed into the vesicular lumen.

## 85 **2. Materials and Methods**

### 86 *2.1. Ethics Approval*

87 Healthy human subjects were recruited at the Department of Sports Medicine, Johannes  
88 Gutenberg-University Mainz, Germany. The experimental procedures were approved by the Human  
89 Ethics Committee Rhineland-Palatinate and adhere to the standards of the Declaration of Helsinki of  
90 the World Medical Association. All subjects were informed about the procedures and the aim of the  
91 study and gave written consent to participate.

### 92 *2.2. Subjects and Exercise Testing*

93 A total of 10 healthy subjects participated in the study. Exclusion criteria were any diseases or  
94 signs of infections, as well as the use of prescribed medications, including anticoagulant treatment.  
95 Exercise testing was performed in the morning after a minimum of 8 h over-night fasting. Five of the  
96 subjects conducted an all-out incremental exercise test on a treadmill. One week later the same  
97 subjects conducted an all-out incremental exercise test on a bicycle ergometer. A second cohort of  
98 five subjects did an all-out incremental exercise test on a treadmill only. For the treadmill tests the  
99 participants started at a speed between 4-6 km/h, according to their expected fitness level. Every three  
100 minutes the speed was increased for 2 km/h with 30-45 sec break between each increment. Cycling  
101 tests started at 40 Watt. Every three minutes the load was increased for 40 Watt. The participants  
102 stopped the tests volitionally after exhaustion. After each step the subjects were asked for their rating  
103 of perceived exhaustion (RPE), values between 6-20 were possible [49]. Heart rate (HR) was measured  
104 continuously.

### 105 *2.3. Blood Sample Collection and Plasma Preparation*

106 At rest (Pre), immediately after (Post), and 30' after the exercise bout venous blood was collected  
107 from the median cubital vein with a Safety-Multifly needle (0.8 × 19 mm) (Sarstedt) and collected in  
108 tripotassium-EDTA covered 7.5 ml Monovettes (Sarstedt). Platelet-free plasma was prepared within  
109 5 min after blood drawing by two rounds of centrifugation for 15 min at 2,500 × g at room temperature  
110 [50]. Plasma was aliquoted and kept on ice or +4°C until EV isolation, to avoid any freezing of the  
111 samples. Samples that were used for estimation of total cfDNA in plasma were stored at -80°C until  
112 measurement.

### 113 *2.4. Extracellular Vesicle Isolation*

114 EVs were purified from plasma either by SEC or immuno-affinity capture followed by magnetic  
115 separation. SEC was performed as described in Brahmer et al., 2019 [17]. Briefly, 2 ml of plasma were  
116 layered on a self-made SEC-column (10 ml column volume, Sepharose CL-2B, Sigma-Aldrich) and a  
117 maximum of 24 one ml-fractions were collected by constantly adding PBS (Figure 1a).

118 For immuno-affinity capture, the Exosome Isolation Kit Pan, human (Miltenyi Biotec) was used  
119 according to the manufacturer's instructions. Briefly, 50 µl of a mixture of anti-CD9, anti-CD63, and  
120 anti-CD81 magnetic beads were added to 2 ml of plasma and incubated for 1 h with constant shaking.  
121 Subsequently, EVs were magnetically captured, washed and eluted in a final volume of 100 µl.  
122 Immuno-affinity captured CD9<sup>+</sup>/CD63<sup>+</sup>/CD81<sup>+</sup>EVs as well as EV-rich and EV-poor SEC fractions were  
123 aliquoted and either prepared for western blotting or treated for cfDNA isolation and/or  
124 measurement as described below. One subject was excluded from the analysis since EV purification  
125 was markedly impaired: The magnetic bead isolation of the post sample repeatedly showed low bead  
126 recovery, indicated by the color of the eluate. Additionally, the SEC column clogged during  
127 separation.

128 We have submitted all relevant data of our experiments to the EV-TRACK knowledgebase (EV-  
129 TRACK ID: EV210058) [51].

### 130 *2.5. Treatment of SEC- or CD9<sup>+</sup>/CD63<sup>+</sup>/CD81<sup>+</sup>EV Samples and DNA Isolation*

131 To study the distribution of cfDNA in the SEC samples and to analyze the susceptibility to  
132 DNase I digestion, 20 µl of SEC samples were either pre-treated for 40 min at 37 °C with DNase I  
133 (Roche) at a concentration of 1 IU/µl, with 10 × Reaction Buffer, or mock treated with PBS. 2 µl of the  
134 samples were used for direct measurement of DNA without prior DNA isolation.

135 To study the association of DNA and CD9<sup>+</sup>/CD63<sup>+</sup>/CD81<sup>+</sup>EVs as well as the proportional part of  
136 DNA which is inside the EVs, the isolated EVs were aliquoted in 20 µl fractions and treated with or  
137 without TritonX100 (TX100; CarlRoth), proteinase K (CarlRoth), and DNase I (Roche) as follows: The  
138 samples were preincubated with TX100 (0.5 % final) and/or proteinase K (50 µg/ml final) with CaCl<sub>2</sub>  
139 (CarlRoth) at a final concentration of 5 mM in PBS (Sigma). All sample were incubated for 30 min at  
140 37°C, shaking at 250 rpm. The proteinase K activity was subsequently inhibited by adding 5 mM

141 phenylmethylsulfonyl fluoride (PMSF) at room temperature. DNaseI at a final concentration of  
142 1 mg/ml and 10 x DNase reaction buffer were added and the samples were incubated for 40 min at  
143 37 °C with shaking, before DNA isolation using the QIAamp DNA Micro Kit (Qiagen), according to  
144 the manufacture's recommendations. Briefly, the samples were filled to 100 µl with buffer ATL,  
145 before adding 10 µl proteinase K, and 100 µl buffer AL. All samples were heat incubated at 56 °C for  
146 10 min. 50 µl EtOH (CarlRoth) were added before the isolation of DNA using the silica columns. The  
147 samples were eluted in a final volume of 20 µl of H<sub>2</sub>O.

## 148 2.6. Western Blotting (WB)

149 CD9<sup>+</sup>/CD63<sup>+</sup>/CD81<sup>+</sup>EVs or SEC fractions were mixed with WB sample buffer (200 mM Tris-HCl  
150 (pH 6.8); 10 % SDS; 0.4 % bromophenol blue; 40 % glycerol; 400 mM DTT; non-reducing conditions  
151 for CD9 and CD63 antibodies) and heated for 10 min at 70 °C. Volume-normalized samples were  
152 subjected to SDS-PAGE (12 % gels) and WB using PVDF-membranes. Membranes were blocked (4 %  
153 milk powder and 0.1 % Tween in PBS) and incubated with primary and HRP-coupled secondary  
154 antibodies followed by chemiluminescent detection.

155 The following antibodies and dilutions were used: CD9 (1:2000 dilution, clone #MM2/57, Merck  
156 Millipore), CD63 (1:500 dilution, #CBL553, Merck Millipore), CD81 (1:1000 dilution, #B-11, Santa  
157 Cruz), CD41 (1:1000 dilution, #SZ.22, Santa Cruz), ApoA1 (1:200 dilution, #12C8, Santa Cruz), goat-  
158 anti-mouse-HRP (1:10,000 dilution, polyclonal, 115-035-166, Dianova).

## 159 2.7. Cell-free DNA Measurement

160 The cfDNA concentration was determined with a quantitative real-time PCR (qPCR) assay,  
161 targeting a hominoid specific 90 bp repetitive DNA element [52]. The repetitive element occurs 3416  
162 times in the genome enabling very sensitive and reliable quantification. The primer sequences are 5'-  
163 TGCCGCAATAAACATACGTG-3' and 5'- GACCCAGCCATCCCATTAC -3' for the forward and  
164 reverse primer, respectively. The following cycling conditions were used with a CFX384 BioRad  
165 cycler: 2 min 98 °C heat activation, followed by 10 sec 95 °C and 10 sec 64 °C for 35 cycles and  
166 subsequent melting curve from 70 – 95 °C with 0.5 °C increments for 10 sec. Each sample was  
167 measured in triplicate of 5 µl with the following final concentrations: Velocity Polymerase 0.6 U  
168 (Bioline), 1.2 x Hifi Buffer (Bioline), 0.1 x SYBR Green (Sigma), 0.3 mM dNTPs (Bioline), 140 nM of  
169 each primer. 2 µl of sample were mixed with 13 µl of mastermix. The amount of DNA was calculated  
170 as described in Neuberger et al. [52], and is briefly described in Appendix A. Plasma as well as the  
171 flow through of the immuno-affinity isolations were diluted 1:10 in ultra-pure H<sub>2</sub>O (Invitrogen) or  
172 1 x PBS (Sigma). To investigate if immuno-beads in the CD9<sup>+</sup>/CD63<sup>+</sup>/CD81<sup>+</sup>EV samples inhibit qPCR  
173 results, spike-in experiments were performed. Undiluted or diluted mock immuno-affinity isolates  
174 (1:1, 1:5, 1:10) and 1 x PBS were spiked with 200 or 20,000 copies of the L1PA2 target sequence. A  
175 dilution of 1:1 did not show any inhibitory effects and was used as the dilution of  
176 CD9<sup>+</sup>/CD63<sup>+</sup>/CD81<sup>+</sup>EV samples.

## 177 2.8. Data Analysis

178 The qPCR data was captured with the CFX Manager Software, Version 3.0 (Bio-Rad) and Microsoft®  
179 Excel, 2016. Statistical analysis was conducted with R version 4.0.3, using tidyverse version 1.3.0, and  
180 rstatix version 0.6.0 packages. The ggplot2 package version 3.2.2 was used for graphical illustrations.  
181 Continuous data was tested for normal distribution with Shapiro-Wilk test, after log normalization.  
182 On a global level repeated measures ANOVAs, including sphericity test, or the non-parametric  
183 Friedman test were performed. A significant global test was followed by post-hoc t tests, or Wilcoxon  
184 rank-sum tests, for normally or non-normally distributed data, respectively. P < 0.05 was considered  
185 statistical significant (\* = P < 0.05, \*\* = P < 0.01, \*\*\* = P < 0.001). Pearson correlation test was applied to  
186 study associations between normally distributed data. Otherwise the non-parametric Spearman  
187 correlation test was used.



### 188 3. Results

#### 189 3.1. Participants characteristics and exercise performance

190 Ten participants, including 9 male and 1 female (age:  $26.8 \pm 4.49$  y, height:  $181.65 \pm 6.8$  cm, weight:  
191  $76.33 \pm 8.03$  kg, BMI:  $23.09 \pm 1.61$ ), underwent all-out exercise tests. The five subjects who performed  
192 a repeated exercise test showed a mean of 5.42 min shorter time until exhaustion for the running  
193 exercise compared to cycling exercise ( $P = 0.028$ , 95 % CI =  $-9.89 - -0.94$ ), with no significant differences  
194 between maximal heart rate ( $P = 0.23$ ), and similar rating of perceived exertion (see Table 1).

195 **Table 1:** Participants characteristics and exercise performance. Values are given in mean ( $\pm$  SD). BMI = body  
196 mass index, RPE = rating of perceived exertion (values between 6 and 20 are possible).

| Subjects | Age (y)            | BMI (kg/m <sup>2</sup> ) | Exercise | Time until exhaustion (min) | Maximal Heart rate (1/min) | RPE                |
|----------|--------------------|--------------------------|----------|-----------------------------|----------------------------|--------------------|
| n=5      | 23.8 ( $\pm$ 1.47) | 22.95 ( $\pm$ 1.57)      | Running  | 22.96 ( $\pm$ 2.56)         | 193.4 ( $\pm$ 2.87)        | 19.6 ( $\pm$ 0.49) |
|          |                    |                          | Cycling  | 28.32 ( $\pm$ 3.54)         | 188.2 ( $\pm$ 8.30)        | 19.8 ( $\pm$ 0.40) |
| n=5      | 29.6 ( $\pm$ 4.72) | 23.56 ( $\pm$ 1.06)      | Running  | 21.10 ( $\pm$ 1.56)         | 189.8 ( $\pm$ 7.08)        | 18.8 ( $\pm$ 0.40) |

197

#### 198 3.2. Distribution of EVs and cfDNA in SEC fractions

199 To study the distribution of plasma cfDNA in platelet poor plasma after SEC, undiluted SEC  
200 samples were used for qPCR quantification without DNA isolation. WB analysis (Figure 1b)  
201 consistently shows the strongest signals for the genuine EV markers CD9, CD81, and CD63 in SEC  
202 fractions #5 and #6. Similarly, the platelet-derived EV marker CD41b becomes most detectable in  
203 those fractions. Overall, EV markers are detectable in SEC fractions #4-7, whereas in fraction #7  
204 already a strong ApoA1 signal appears, indicating a relevant lipoprotein co-isolation. DNA starts to  
205 incline in SEC #4, showing the highest concentration in SEC #9 (Figure 1c). The DNA concentrations  
206 display a plateau from SEC #12 to #15, declining sharply after SEC #16. About 17.2 % of the total DNA  
207 (38.5 ng) occurs in the SEC fractions #4-7 while a part of 7.17 % occurs in the fractions 5 and 6, which  
208 show highest EV amounts. The major part of cfDNA is found in non-EV SEC fractions and only a  
209 minor part can possibly be associated with EVs.

#### 210 3.3. DNA digestion in SEC fractions

211 To get an impression about susceptibility of the DNA contained in the distinct SEC fractions for  
212 DNase I digestion, a pre-exercise (Pre) and a post-exercise (Post) plasma sample were subjected to  
213 SEC and treated with DNase I. The total plasma cfDNA concentration increased ~9-fold from  
214 16.65 ng/ml (Pre) to 173.40 ng/ml (Post) during exercise. The amount of DNA recovered in SEC  
215 samples (sum of SEC #1-16) was 16.85 ng in Pre and 173.4 ng in Post. The distributions of the cfDNA  
216 concentrations over the different SEC samples were highly similar between the Pre and Post samples  
217 ( $r = 0.977$ ;  $P < 0.001$ ). In the vesicular fractions (SEC #4-7) 21.61 % (Pre) and 24.98 % (Post) of the total  
218 DNA were detected. In the EV-rich fractions (SEC #5 and #6) are 11.49 % (Pre) and 13.08 % (Post) of  
219 the total DNA. DNase I treatment slightly decreased the amount of DNA in fractions #4-7 from  
220 4.03 ng to 2.14 ng in the Pre samples, and from 43.32 to 30.91 ng in the Post samples. In the remaining  
221 SEC fractions, more than 80 % of the DNA was digested. These results indicate that ~70-80 % of the  
222 total plasma cfDNA in Pre and Post conditions is not protected from DNase digestion, while the  
223 remaining part might be protected either by EVs or co-isolated lipoproteins or plasma proteins.  
224

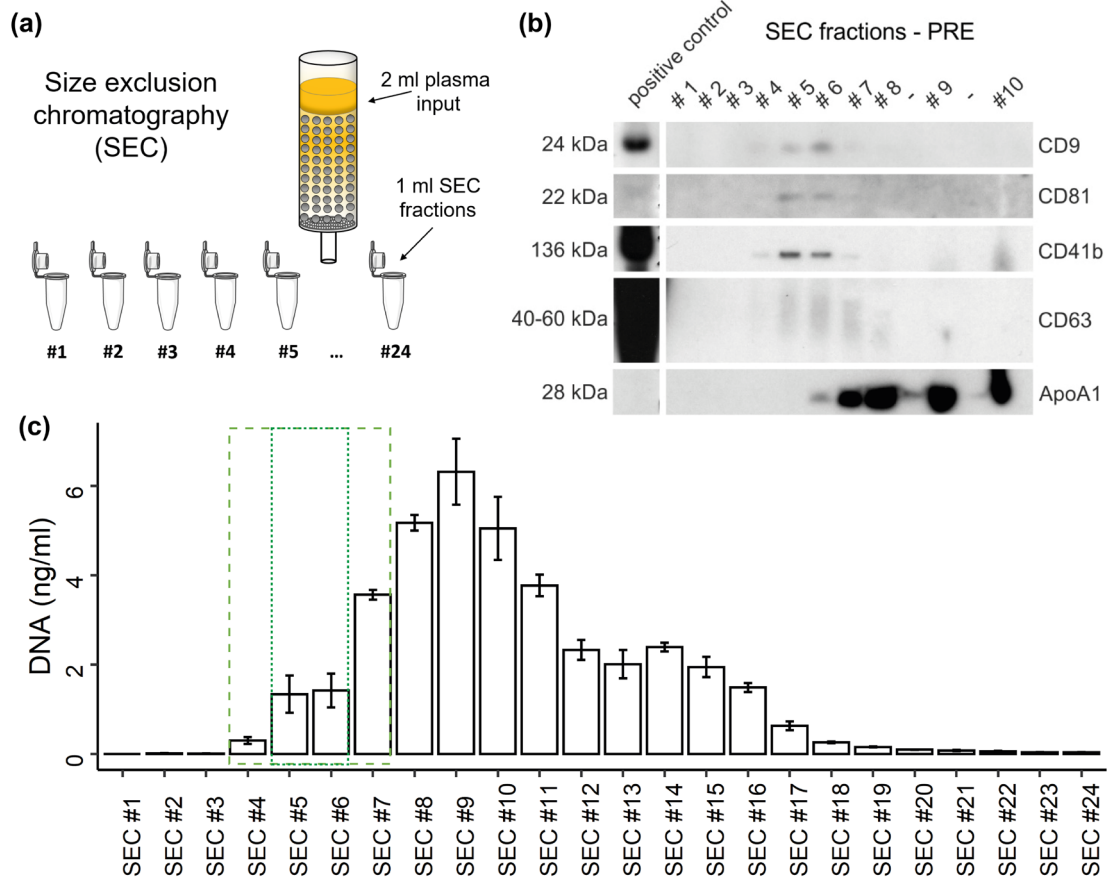

225  
226  
227  
228  
229  
230

**Figure 1.** Distribution of EVs and DNA in SEC fractions. **(a)** Illustration of size exclusion chromatography (SEC) of plasma. **(b)** Western blot (WB) analysis of specific SEC fractions using genuine EV-markers including CD9, CD81, and CD63, as well as platelet specific marker CD41b, and lipoprotein marker ApoA1. **(c)** Concentration of DNA in SEC fractions measured by qPCR. The dashed box indicates SEC fractions containing EVs. The dotted box highlights most EV rich fractions.

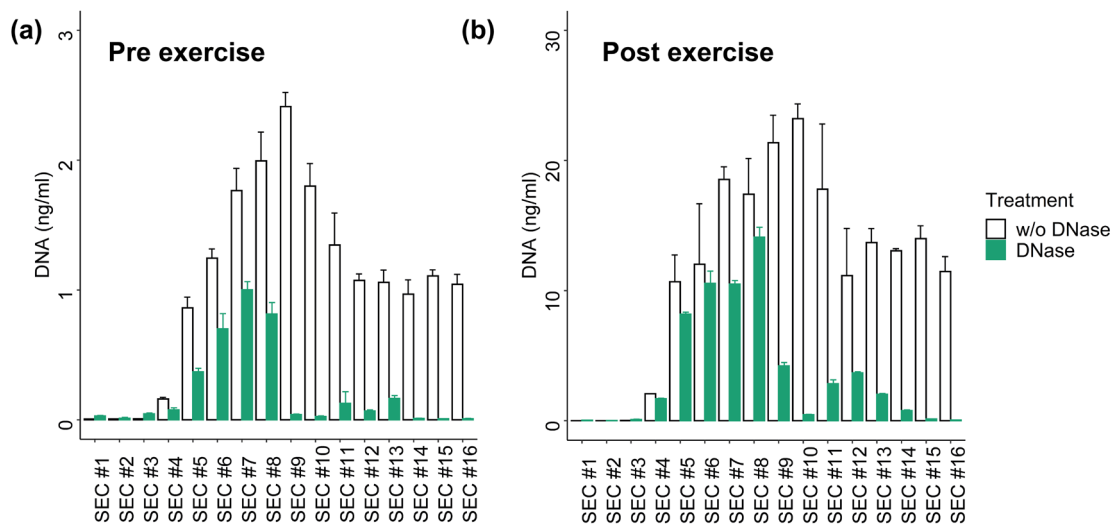

231  
232  
233  
234  
235

**Figure 2.** Distribution of DNA in SEC fractions with or without DNase I digestion of (a) Pre exercise plasma sample and (b) Post exercise sample. The DNA concentration was measured with qPCR without prior DNA isolation. Post exercise values show ~10 fold higher DNA concentrations.

236

237 3.4. DNA associated with CD9<sup>+</sup>/CD63<sup>+</sup>/CD81<sup>+</sup>EVs

238 Since EV preparation by SEC is highly susceptible to co-isolate large lipoproteins, which are  
239 associated with extracellular plasma DNA [53], we decided to further study the association of DNA  
240 with EVs prepared by immuno-affinity capture, which shows higher purity. Figure 3a illustrates  
241 capture and magnetic separation of CD9<sup>+</sup>/CD63<sup>+</sup>/CD81<sup>+</sup>EVs from plasma. WB analysis confirmed the  
242 abundance of EV markers (a representative WB is presented in Figure 3b). Figure 3c displays the  
243 amount of DNA in 1 ml of plasma, 1 ml of flow through (FT), or CD9<sup>+</sup>/CD63<sup>+</sup>/CD81<sup>+</sup>EVs  
244 corresponding to 1 ml of plasma. The samples were taken Pre, Post, and 30' after exercise, from n = 5  
245 subjects who performed two repeated exercise tests. Multiple comparison t tests did not show  
246 significant differences between plasma cfDNA and FT cfDNA in any of the time points (P values  
247 without adjustment for multiple comparisons are presented, see Figure 3c). Figure 3e shows the  
248 percentage of EV-associated DNA with the total amount of plasma DNA. Overall,  $0.12 \pm 0.05$  %  
249 (median  $\pm$  SEM) of the total plasma DNA is associated with CD9<sup>+</sup>/CD63<sup>+</sup>/CD81<sup>+</sup>EVs. Specifically,  $0.12 \pm 0.08$  %  
250 in the Pre samples,  $0.15 \pm 0.14$  % in the Post, and  $0.07 \pm 0.02$  % in the +30' samples. The  
251 significant and strong correlation between plasma and CD9<sup>+</sup>/CD63<sup>+</sup>/CD81<sup>+</sup>EV cfDNA values (Figure  
252 3d) indicates that a higher amount of DNA occurs in association with EVs if plasma cfDNA levels are  
253 higher.

254 Former studies indicated that different exercise modalities lead to different cfDNA increases.  
255 All-out treadmill running increased cfDNA levels ~10 fold [41,54], whereas all-out cycling increased  
256 plasma cfDNA only ~5 fold [17,55]. To evaluate the influence of the exercise setting on EV kinetics,  
257 five subjects performed each of the exercise tests. Figure 4 displays the fold changes of cfDNA in  
258 plasma and CD9<sup>+</sup>/CD63<sup>+</sup>/CD81<sup>+</sup>EV associated DNA, as well as WB results for CD9 and CD41b. Two-  
259 way repeated measures ANOVA indicated that plasma cfDNA levels differ significantly between  
260 time points and between exercise modalities running and cycling ( $F(2,8) = 14.55$ ,  $P = 0.002$ ). After  
261 cycling the cfDNA increased 4.06 fold. Running led to a 12.38 fold increase from Pre to Post  
262 ( $P = 0.013$ ). The CD9<sup>+</sup>/CD63<sup>+</sup>/CD81<sup>+</sup>EV associated DNA increased significantly over time ( $F(2,6) =$   
263  $28.67$ ,  $P < 0.001$ ), showing no differences between running and cycling ( $F(1,3) = 2.12$ ,  $P = 0.242$ ). Hence,  
264 in both cases the EV associated DNA increased similarly after running (fold change = 4.64) and  
265 cycling (fold change = 4.25). Likewise, for WB analysis of EV markers (CD9, CD41b, CD81) no  
266 significant difference was found between the exercise modalities, whereas the markers showed  
267 significant changes over time (CD9:  $F(2,8) = 13.04$ ,  $P = 0.003$ ; CD41b:  $F(2,8) = 15.38$ ,  $P = 0.002$ ; CD81:  
268  $F(2,8) = 1.58$ ,  $P = 0.021$ ). The results confirm an increase of cfDNA and EVs after exercise. Notably,  
269 cfDNA concentration increases stronger after running compared to cycling, whereas no influence of  
270 the exercise setting was detectable on EV release and EV associated DNA, confirming independent  
271 release mechanisms [41].

272

273

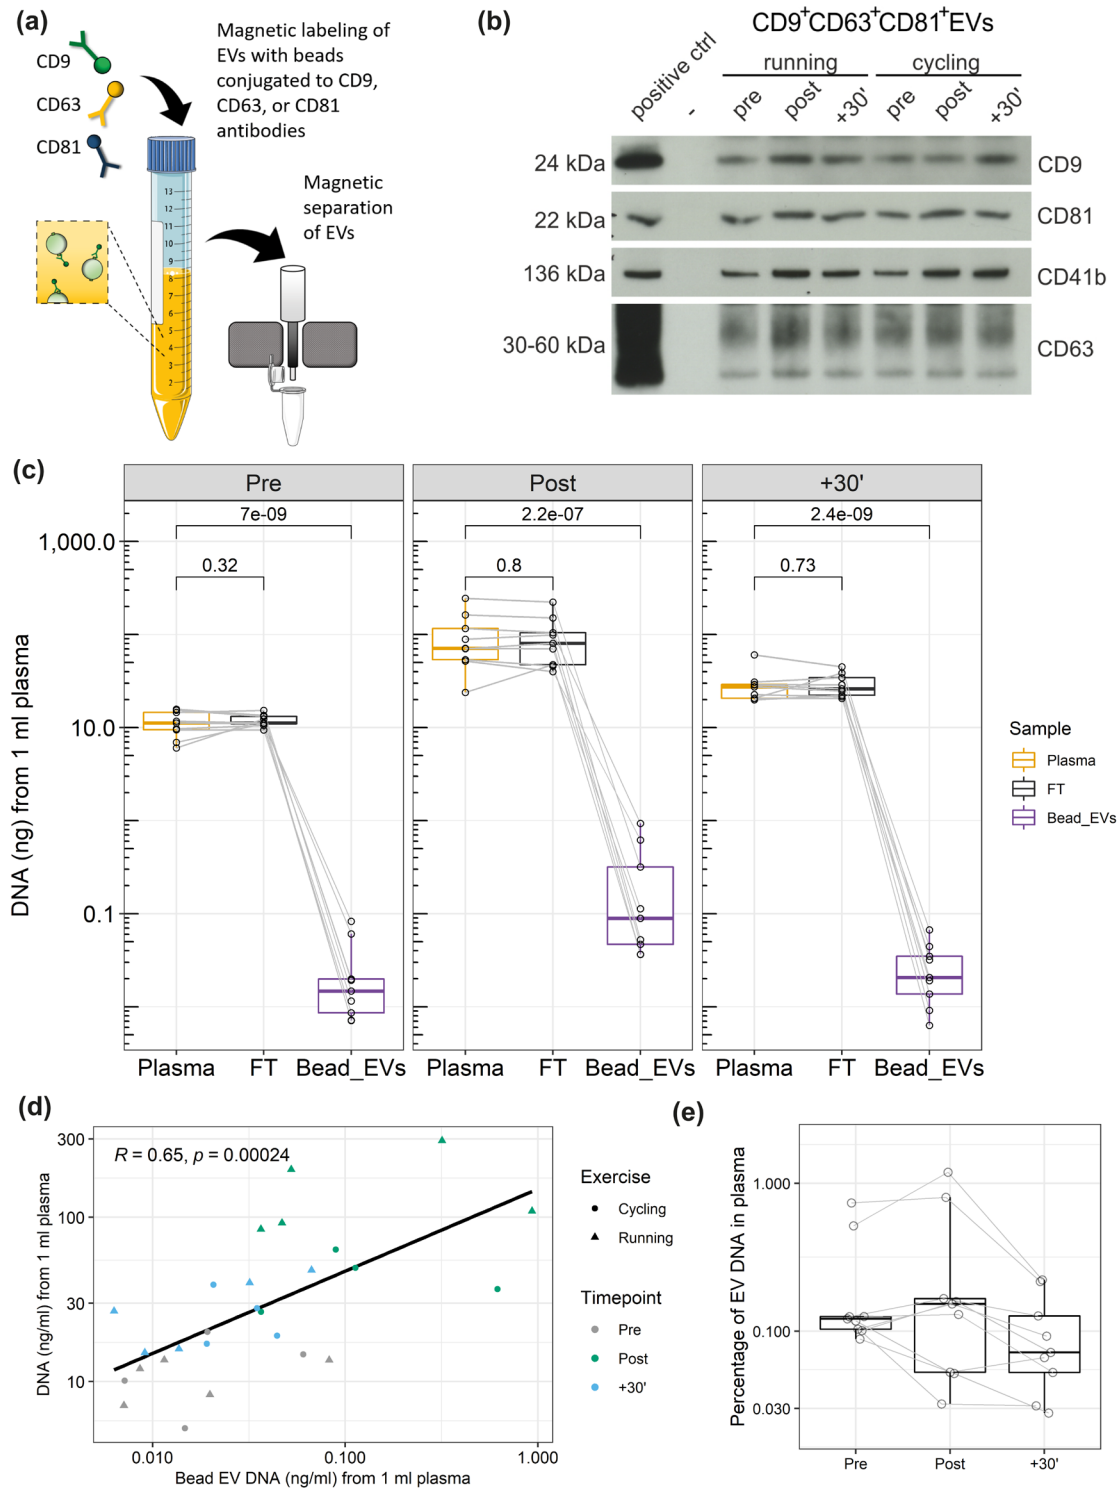

274

275

276

277

278

279

280

**Figure 3.** DNA associated to CD9+/CD63+/CD81+EVs. **(a)** Illustration of EV immunobead isolation (anti-CD9/CD63/CD81). **(b)** Western blot detection of EV proteins CD9, CD81, CD63, as well as platelet specific marker CD41b. **(c)** Amount of DNA in plasma, flow through, and CD9+/CD63+/CD81+EVs. The values represent the amount of DNA from 1 ml of plasma. **(d)** Correlation between DNA amount in plasma and DNA amount of CD9+/CD63+/CD81+EVs. **(e)** Percentage of CD9+/CD63+/CD81+EV DNA in relation to the total DNA amount in plasma.



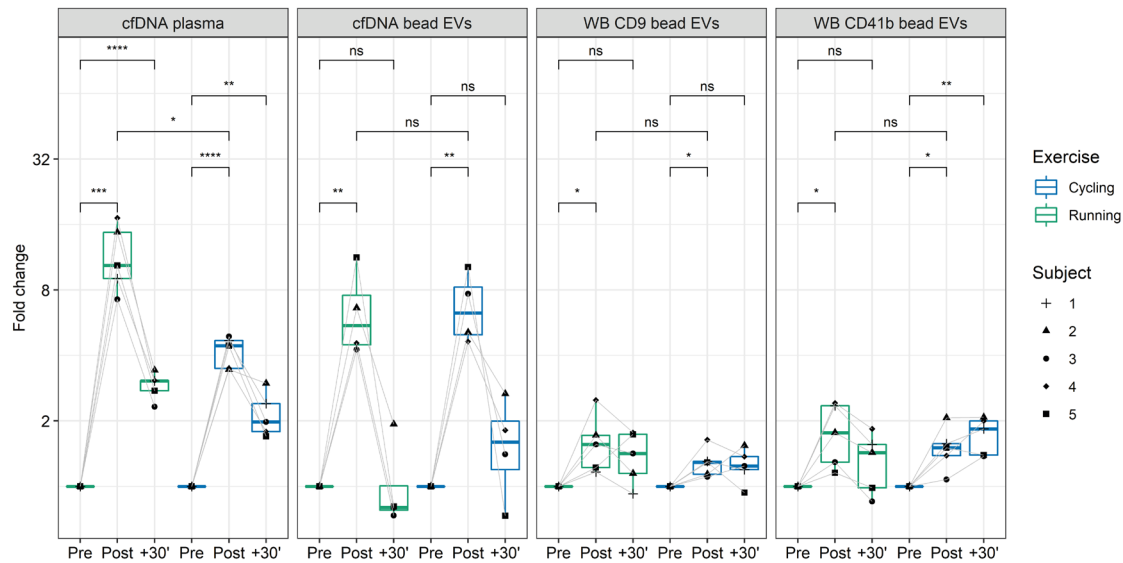

281

282 **Figure 4.** cfDNA and CD9<sup>+</sup>/CD63<sup>+</sup>/CD81<sup>+</sup>EVs kinetics in running versus cycling. The fold-changes of  
 283 plasma cfDNA and CD9<sup>+</sup>/CD63<sup>+</sup>/CD81<sup>+</sup>EVs DNA, detected with qPCR, and fold changes of  
 284 CD9<sup>+</sup>/CD63<sup>+</sup>/CD81<sup>+</sup>EVs, represented by CD9 and CD41b western blot analysis, in running and cycling  
 285 exercise are illustrated. The labels represent selected comparisons between time points and exercise  
 286 modalities, reflecting unadjusted p-values (\* = P < 0.05, \*\* = P < 0.01, \*\*\* = P < 0.001).

### 287 3.5. DNA cargo of EVs

288 To study the proportion of DNA which is associated with the EV surface or protected within the  
 289 lumen of EVs, CD9<sup>+</sup>/CD63<sup>+</sup>/CD81<sup>+</sup>EVs were treated as illustrated in Figure 5a, with or without DNase,  
 290 and, in combination with protease or TX100. Subsequently, the DNA was isolated using a purification  
 291 kit. DNase treatment should reduce the major part of DNA on the surface of EVs, however, a more  
 292 efficient degradation could be reached in the presence of proteases that hydrolyse DNA-bound  
 293 proteins [56]. A first comparison of DNase treated or untreated Pre and Post samples (Figure 5b),  
 294 shows that the total amount of DNA increases significantly from Pre 9.51 (± 2.69) ng/ml to Post 77.37  
 295 (± 37.41) ng/ml (mean ± SEM). Notably, the DNase treated Pre and Post values do not differ  
 296 significantly, showing similar DNA concentrations with Pre 3.61 (± 4.28) and Post 2.26 (± 1.50) ng/ml.  
 297 This indicates that the cfDNA, which increased in response to exercise, is associated with the surface  
 298 of EVs, susceptible for DNase digestion. As shown in Figure 5c and 5d, the DNase treatment reduced  
 299 the amount of DNA in the Pre exercise samples from 9.51 (± 5.39) ng/ml (100 %) to 3.60 (± 2.14) ng/ml  
 300 (43.88 %). DNase and protease reduced the concentration to 1.50 (± 0.39) ng/ml (20.11 %). TX100 and  
 301 DNase treatment enabled the digestion of almost all DNA, reducing the value to 0.23 (± 0.02) ng/ml.  
 302 The results indicates that ~20 % of the EV associated DNA are within the lumen of the EVs. The  
 303 treatment with TX100 and protease without DNase showed similar results, compared to the  
 304 untreated condition (7.85 ± 2.29 ng/ml, equaling 84.5 %). In the Post samples (Figure 5e and 5f) the  
 305 DNase digest showed that almost all DNA is sensitive to DNase digestion, reducing the DNA  
 306 concentration down to 4.47 % of the total EV associated DNA. Notably, in the Post samples the  
 307 treatment condition protease with DNase showed slightly higher values than DNase alone (4.97 ±  
 308 1.12 and 2.26 ± 0.75 ng/ml, respectively). Additionally, in the TX100 and DNase treated samples  
 309 remaining DNA was detected (3.27 ± 1.91 ng/ml), which might indicate that the DNase treatment did  
 310 not work efficiently in the Post samples, which have about 8-fold higher DNA values compared to  
 311 the Pre samples.  
 312

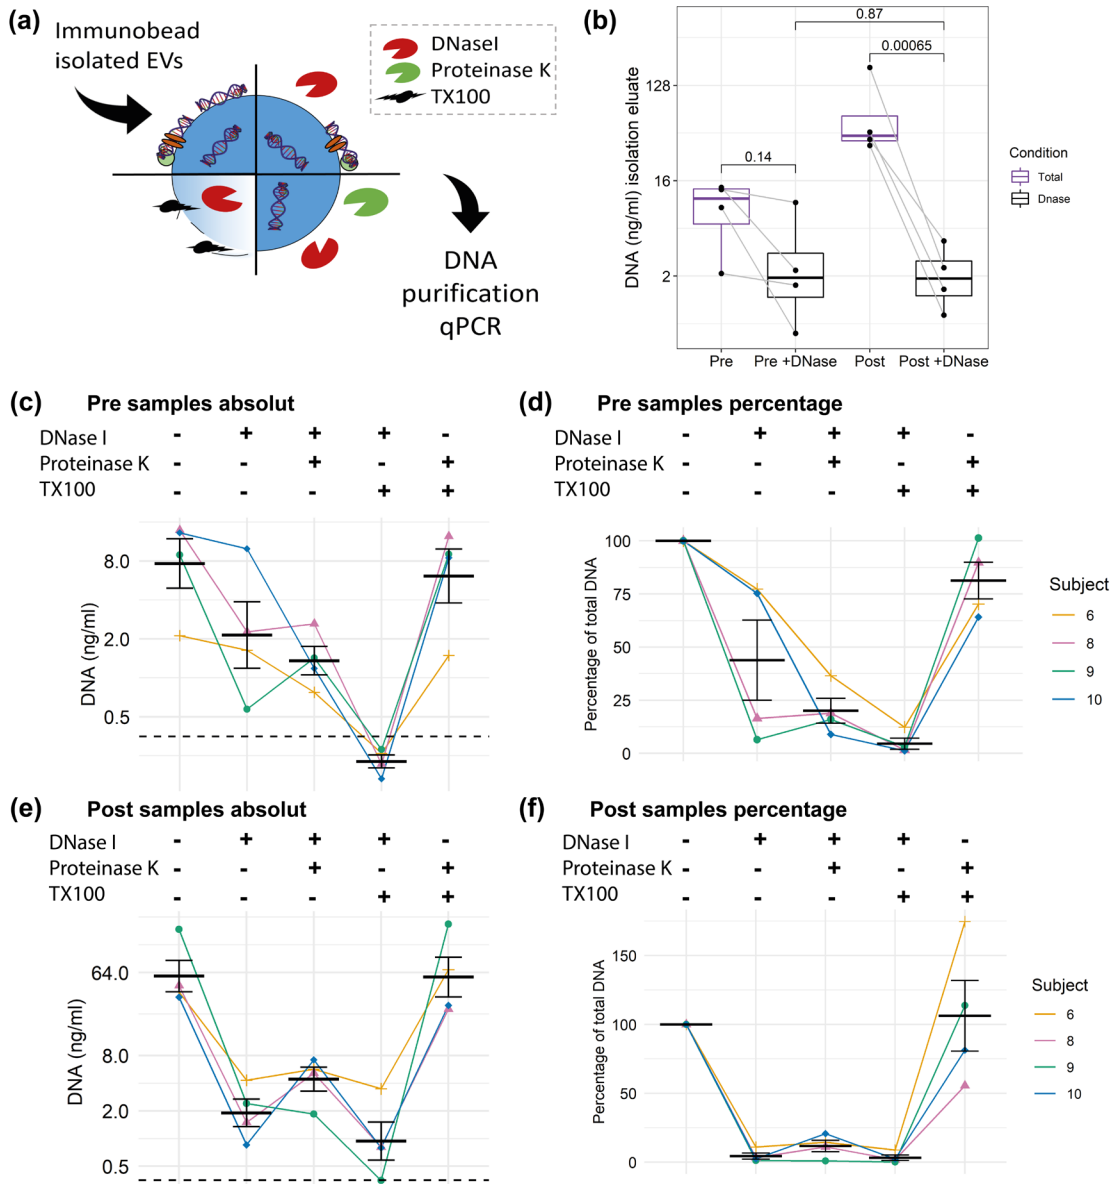

313

314 **Figure 5.** DNA cargo of CD9<sup>+</sup>/CD63<sup>+</sup>/CD81<sup>+</sup>EVs. (a) Illustration of different digestion strategies. (b)  
 315 Comparison of Pre and Post samples with or without DNase I digestion. Unadjusted t test results are  
 316 displayed. Absolute and relative concentration of the Pre samples (c,d) and Post samples (e,f). Error bars  
 317 indicate mean  $\pm$  SEM. The dashed black line indicates the limit of detection (LOD) of the qPCR.

#### 318 4. Discussion

319 In spite of the great interest for cfDNA [57] and EVs [58] in the field of liquid biopsy, the  
 320 association of the two entities has not been studied extensively [1,15,58]. Especially the association of  
 321 DNA and EVs in the plasma of healthy human individuals remained elusive. Here we made use of  
 322 acute exercise as a physiological model to study the concomitant release and relationship between  
 323 EVs and cfDNA in the circulation. The results demonstrate that only a minute part of cfDNA is  
 324 associated with EVs in human plasma. EV-associated DNA is largely associated with the surface as  
 325 part of the corona and only found in trace amounts in the EV-lumen. Using a highly sensitive qPCR,  
 326 we found a small amount of DNA in the lumen of immuno-affinity captured CD9<sup>+</sup>/CD63<sup>+</sup>/CD81<sup>+</sup>EVs,  
 327 which was protected from DNase digestion. CfDNA and EVs both increase during exercise, whereas  
 328 the cfDNA increase appears to occur completely independent of EVs and DNA is attached to the EV  
 329 surface. Since the DNase-resistant fraction of EV-associated is constant from pre to post exercise, we  
 330 conclude that the ExerV subpopulations do not contain luminal DNA.

331 We found that under physiological conditions only ~0.12 % of the total plasma DNA is associated  
332 with CD9<sup>+</sup>/CD63<sup>+</sup>/CD81<sup>+</sup>EVs (Figure 3e). Of this part ~20 % are protected within the lumen of the EVs  
333 indicated by DNase digestion experiments (Figure 5). These results are in line with several previous  
334 findings on the association of DNA to EVs. In 2015, we studied the amount of extracellular DNA in  
335 plasma and EV sub-populations isolated by dUC [41], where most of the plasma DNA was detected  
336 in the supernatants after centrifugation. In 10.000x g pellets about 4.67 % of the DNA occurred,  
337 representing the DNA in larger MVs and apoptotic bodies. In the UC small EV pellet 3.94 % of the  
338 DNA occurred. An additional DNase digestion of the pellet led to further reduction to 0.94 %, which  
339 indicated that ~23 % of the EV associated DNA was protected from degradation. Similarly, Lázaro-  
340 Ibáñez et al., found DNA associated with low density and high density small EV populations prepared  
341 by density gradient centrifugation, which was mostly associated with the vesicle surface [37]. Only  
342 20.9 % or 3 % of the DNA of TF-1 or HMC-1 cell EVs were protected from DNase digestion. Also,  
343 Fischer et al. found about one quarter of the DNA within the small EVs released from human  
344 mesenchymal stromal cells [28]. These results collectively indicate that only a minor part of cell-free  
345 DNA is associated to EVs and an even smaller part is actually transported encapsulated within the  
346 EVs.

347 A high amount of cfDNA cargo might be a characteristic of cancer cell derived EVs. A number  
348 of studies found DNA in cancer-derived EVs using different separation technologies including UC  
349 [36], dUC [25,40], density gradient centrifugation [37,39], flow field fractioning [32], as well as nano-  
350 flow cytometry [30]. Now it is widely accepted that DNA is a constituent of EVs in cancer patients  
351 [1], whereas DNA is more abundant in large EVs compared to small EVs [39]. More recent sub-  
352 characterization of the cancer small EVs into exosomal/non-exosomal [59], high density/low density  
353 populations [37], or distinct nanoparticles [33] / exomers [32], further challenge a clear association of  
354 DNA in small EVs. Zhang et al. found DNA associated with small EVs and distinct nanoparticles  
355 [33], whereas Jeppesen et al. did not find DNA in small EVs after DNase digestion [26]. Notably,  
356 cancer cells have a disrupted homeostasis and a direct comparison between so-called oncosomes and  
357 EVs released from healthy cells is hampered [39,40]. Our findings on a very small amount of DNA  
358 associated to EVs in healthy individuals are in line with the hypothesis that oncosomes are highly  
359 dissimilar to EVs in a physiological state.

360 Next to the cellular origin (cancer vs. healthy) the separation of EVs, as well as quantification of  
361 DNA will affect study outcomes. Contrasting our results, Fernando et al. described that up to 90 %  
362 of the plasma DNA is associated with EVs [43]. These differing results could be due to the choice of  
363 chemical precipitation as EV purification method. Precipitation based EV separation methods co-  
364 isolate a relevant amount of plasma macrocomplexes including lipoproteins [60,61]. The latter are  
365 likewise described to be carriers of extracellular DNA. About 12 % of the extracellular plasma DNA  
366 were shown to be associated to circulating lipoprotein complexes [53]. Hence, the quantified DNA  
367 amount in EV precipitates may overestimate the actual amount of EV-associated DNA. Notably, in  
368 our experiments using SEC for EV preparation not only the fractions showing EV markers (#4-#7) are  
369 protected from DNase digestion, but also other fractions are less sensitive to degradation (e.g. #8/#9,  
370 Figure 2). This might be a result of DNA association with other structures including lipoproteins or  
371 plasma proteins [62], highlighting the influence of the method of EV separation from plasma on  
372 experimental outcome.

373 Also, the method of cfDNA analysis is of high importance to study the DNA cargo of EVs. In a  
374 well-designed study, Vagner et al. analyzed the amount of DNA in dUC separated plasma EVs of 40  
375 cancer patients and a subset of 6 healthy controls. The researchers detected 6-7 fold more DNA in  
376 large EVs, compared to small EVs of cancer patients. However, no DNA was detected in EVs  
377 separated from 1 ml of plasma from healthy subjects [39]. Notably, the High Sensitivity (HS) dsDNA  
378 Qubit Assay kit was used for DNA detection. During the handling process the samples are diluted at  
379 least 10 times in Qubit® working solution [63]. The lower detection range of the kit is 1 or at least 0.5  
380 ng/ml, whereas the values refer to the concentration of the diluted sample. Therefore, the sensitivity  
381 of the measurement device might not be sufficient, to detect the low concentrations of DNA  
382 associated with EVs. In contrast, our DNA quantification relies on a qPCR which amplifies repetitive

383 DNA elements showing a very high sensitivity [52], which enables to measure the low DNA  
384 concentrations present in EVs.

385 Despite a similar cellular origin of EVs and cfDNA in blood following exercise suggests a joint  
386 release mechanism, we found further evidence for their independent release. Early sex-mismatch  
387 transplantation models showed that the major part of cfDNA is released from cells of the  
388 hematopoietic lineage [12]. In a similar study design we showed that hematopoietic cells are the  
389 major source of cfDNA during exercise [13]. More recently, the analysis of the methylation profile of  
390 cfDNA shows that about 32 % of cfDNA is derived from granulocytes, 30 % from erythrocyte  
391 progenitors, 23 % from monocytes and lymphocytes, 9 % from endothelial cells, and only 6 % from  
392 other cells including neurons and hepatocytes [11], while a sub-characterization for exercise released  
393 cfDNA has not been conducted yet. We and others found that next to muscle cells, platelets,  
394 endothelial cells, and leukocytes, significantly contribute to the pool of EVs released into plasma  
395 following physical exercise (reviewed in [48,64–66]). Like for cfDNA, the underlying signaling  
396 mechanisms are not fully understood, but an association with shear stress and the activation of  
397 coagulative processes are discussed [48]. Since cfDNA and EVs seem to be released by similar cell  
398 types during physical exercise, a joint or related release mechanism is possible, but remains  
399 speculative.

400 Intriguingly, our results indicate that cfDNA and EVs are not released as a single entity during  
401 exercise but likely associate with each other after their release. This assumption is based on two  
402 findings. First, as expected, the total cfDNA levels increased with a higher fold change after running  
403 exercise compared to cycling exercise (Figure 4). In contrast, the increase in the amount of DNA  
404 associated with CD9<sup>+</sup>/CD63<sup>+</sup>/CD81<sup>+</sup>EVs was similar (Figure 4). If cfDNA release would occur together  
405 with EVs, similar fold changes would have been expected. Secondly, after DNase digestion, Pre and  
406 Post exercise EV samples (Figure 5b) include a similar amount of DNase-resistant DNA, although  
407 the EV-levels increase through the release of ExerVs. Indicating, that ExerVs do not contain DNA.  
408 Interestingly, the amount of surface bound DNA increased significantly during exercise, suggesting  
409 that cfDNA after its release is recruited to the EV surface and attached to the corona. As reviewed by  
410 Buzás et al., the EV corona can be physiologically relevant [23].

411 Overall, our study describes that only a minor part of cfDNA is associated with EVs in healthy  
412 humans. Our findings contrast with a high DNA association with oncosomes indicating distinct  
413 release mechanisms for the EV subtypes of different origin. It is conceivable that the minor and stable  
414 fraction of DNA-containing EVs in human plasma observed in the exercise paradigm reflect the  
415 steady state population of apoptotic bodies in the circulation, expected to contain fragments of DNA  
416 and known to remain constant within the timeframe of acute exercise. Furthermore, ExerVs appear  
417 to be free of luminal DNA. However, a single bout of all-out exercise significantly increases the  
418 amount of DNA bound to the surface of EVs. Surface DNA may well be of physiological significance  
419 for the adaptational processes induced by regular physical exercise, requiring further investigations.  
420 It will be interesting to examine the specific characteristics of surface-associated and luminal DNA of  
421 plasma EVs. Since we amplified a repetitive element which is distributed throughout the human  
422 genome, further research should emphasize the sequencing of the DNA. Despite only a minor part  
423 of DNA is EV associated, studying intraluminal and surface-bound DNA could reveal valuable  
424 information for the field of liquid biopsy linking EV DNA with physiological properties such as  
425 inflammation.

426

#### 427 **Author Contributions:**

428 EMKA, PS, AB, EN conceived the original idea. BH, EMKA, PS, EN, AB conceived and planned the  
429 experiments. EN, AB, BH, KM performed experiments. EN and AB wrote the manuscript in  
430 consultation with EMKA, PS, BH and KM.

#### 431 **Funding:**

432 The study was supported by intramural funding (Stufe 1) of the Johannes Gutenberg University  
433 Mainz.

434 **Conflicts of Interest:**

435 The authors declare no conflict of interest.

436 **Appendix A**

437 To calculate the amount of DNA we utilized a validated qPCR assay [52]. Ahead of the  
438 measurements, the linearity, limit of quantification, limit of detection of the assay were established  
439 with three independent standard curves. In addition, a set of two reference samples were validated  
440 and are included in each run. The reference samples allow a calibration to account for inter-plate  
441 differences. To calculate the number of molecules in a 5 $\mu$ l qPCR the following formula is applied:  
442  $10^{(C_q - \text{intercept})/\text{slope}}$ . The intercept and slope values are derived from the validated standard curves. A  
443 deviation by 5 results in the number of molecules per  $\mu$ l. To calculate the number of genome  
444 equivalents per ml (GE/ml) the number of molecules are multiplied with the dilution factor of the  
445 sample and divided by 3416 (the number of hits of the amplified target in the human genome). The  
446 resulting genome equivalents are multiplied with 3.23 pg, the weight of a haploid genome. The full  
447 formula is as follows:

448 
$$\text{ng/ml} \triangleq \text{pg}/\mu\text{l} = 10^{(C_q - \text{intercept})/\text{slope}} / 5\mu\text{l} / \text{dilution factor of the sample} * 3.23 \text{ pg} / 3416$$

449

450 **References**

- 451 1. Malkin, E.Z.; Bratman, S. V. Bioactive DNA from extracellular vesicles and particles. *Cell Death Dis.* **2020**,  
452 *11*, 584, doi:10.1038/s41419-020-02803-4.
- 453 2. Contrepois, K.; Wu, S.; Moneghetti, K.J.; Hornburg, D.; Ahadi, S.; Tsai, M.S.; Metwally, A.A.; Wei, E.;  
454 Lee-McMullen, B.; Quijada, J. V.; et al. Molecular Choreography of Acute Exercise. *Cell* **2020**,  
455 doi:10.1016/j.cell.2020.04.043.
- 456 3. Uhlén, M.; Karlsson, M.J.; Hober, A.; Svensson, A.-S.; Scheffel, J.; Kotol, D.; Zhong, W.; Tebani, A.;  
457 Strandberg, L.; Edfors, F.; et al. The human secretome. *Sci. Signal.* **2019**, *12*, eaaz0274,  
458 doi:10.1126/scisignal.aaz0274.
- 459 4. Stroun, M.; Anker, P. Nucleic acids spontaneously released by living frog auricles. *Biochem. J.* **1972**,  
460 doi:10.1042/bj1280100Pb.
- 461 5. Anker, P.; Stroun, M.; Maurice, P.A. Spontaneous Release of DNA by Human Blood Lymphocytes as  
462 Shown in an in Vitro System. *Cancer Res.* **1975**.
- 463 6. Bronkhorst, A.J.; Wentzel, J.F.; Aucamp, J.; van Dyk, E.; du Plessis, L.; Pretorius, P.J. Characterization of  
464 the cell-free DNA released by cultured cancer cells. *Biochim. Biophys. Acta - Mol. Cell Res.* **2016**,  
465 doi:10.1016/j.bbamcr.2015.10.022.
- 466 7. Galvanin, A.; Dostert, G.; Ayadi, L.; Marchand, V.; Velot, É.; Motorin, Y. Diversity and heterogeneity of  
467 extracellular RNA in human plasma. *Biochimie* **2019**, *164*, 22–36, doi:10.1016/j.biochi.2019.05.011.
- 468 8. Beiter, T.; Fragasso, A.; Hudemann, J.; Nieß, A.M.; Simon, P. Short-Term Treadmill Running as a Model  
469 for Studying Cell-Free DNA Kinetics In Vivo. *Clin. Chem.* **2011**, *57*, 633–636,  
470 doi:10.1373/clinchem.2010.158030.
- 471 9. Breitbach, S.; Sterzing, B.; Magallanes, C.; Tug, S.; Simon, P. Direct measurement of cell-free DNA from



- 472 serially collected capillary plasma during incremental exercise. *J. Appl. Physiol.* **2014**,  
473 doi:10.1152/jappphysiol.00002.2014.
- 474 10. Shah, R.; Yeri, A.; Das, A.; Courtright-Lim, A.; Ziegler, O.; Gervino, E.; Ocel, J.; Quintero-Pinzon, P.;  
475 Wooster, L.; Bailey, C.S.; et al. Small RNA-seq during acute maximal exercise reveal RNAs involved in  
476 vascular inflammation and cardiometabolic health: Brief report. *Am. J. Physiol. - Hear. Circ. Physiol.* **2017**,  
477 doi:10.1152/ajpheart.00500.2017.
- 478 11. Moss, J.; Magenheimer, J.; Neiman, D.; Zemmour, H.; Loyfer, N.; Korach, A.; Samet, Y.; Maoz, M.; Druid,  
479 H.; Arner, P.; et al. Comprehensive human cell-type methylation atlas reveals origins of circulating cell-  
480 free DNA in health and disease. *Nat. Commun.* **2018**, doi:10.1038/s41467-018-07466-6.
- 481 12. Lui, Y.Y.N.; Woo, K.-S.; Wang, A.Y.M.; Yeung, C.-K.; Li, P.K.T.; Chau, E.; Ruygrok, P.; Lo, Y.M.D. Origin  
482 of Plasma Cell-free DNA after Solid Organ Transplantation. *Clin. Chem.* **2003**, *49*, 495–496,  
483 doi:10.1373/49.3.495.
- 484 13. Tug, S.; Helmig, S.; Deichmann, E.R.; Schmeier-Jürchott, A.; Wagner, E.; Zimmermann, T.; Radsak, M.;  
485 Giacca, M.; Simon, P. Exercise-induced increases in cell free DNA in human plasma originate  
486 predominantly from cells of the haematopoietic lineage. *Exerc. Immunol. Rev.* **2015**.
- 487 14. Jiang, P.; Lo, Y.M.D. The Long and Short of Circulating Cell-Free DNA and the Ins and Outs of Molecular  
488 Diagnostics. *Trends Genet.* **2016**, *32*, 360–371, doi:10.1016/j.tig.2016.03.009.
- 489 15. Grabuschnig, S.; Bronkhorst, A.J.; Holdenrieder, S.; Rosales Rodriguez, I.; Schliep, K.P.; Schwendenwein,  
490 D.; Ungerer, V.; Sensen, C.W. Putative Origins of Cell-Free DNA in Humans: A Review of Active and  
491 Passive Nucleic Acid Release Mechanisms. *Int. J. Mol. Sci.* **2020**, *21*, 8062, doi:10.3390/ijms21218062.
- 492 16. Yáñez-Mó, M.; Siljander, P.R.M.; Andreu, Z.; Bedina Zavec, A.; Borràs, F.E.; Buzas, E.I.; Buzas, K.; Casal,  
493 E.; Cappello, F.; Carvalho, J.; et al. Biological properties of extracellular vesicles and their physiological  
494 functions. *J. Extracell. Vesicles* **2015**, *4*, 27066, doi:10.3402/jev.v4.27066.
- 495 17. Brahmer, A.; Neuberger, E.; Esch-Heisser, L.; Haller, N.; Jorgensen, M.M.; Baek, R.; Möbius, W.; Simon,  
496 P.; Krämer-Albers, E.-M. Platelets, endothelial cells and leukocytes contribute to the exercise-triggered  
497 release of extracellular vesicles into the circulation. *J. Extracell. Vesicles* **2019**, *8*, 1615820,  
498 doi:10.1080/20013078.2019.1615820.
- 499 18. Frühbeis, C.; Helmig, S.; Tug, S.; Simon, P.; Krämer-Albers, E.-M. Physical exercise induces rapid release  
500 of small extracellular vesicles into the circulation. *J. Extracell. Vesicles* **2015**, *4*, 28239,  
501 doi:10.3402/jev.v4.28239.
- 502 19. Whitham, M.; Parker, B.L.; Friedrichsen, M.; Hingst, J.R.; Hjorth, M.; Hughes, W.E.; Egan, C.L.; Cron, L.;  
503 Watt, K.I.; Kuchel, R.P.; et al. Extracellular Vesicles Provide a Means for Tissue Crosstalk during  
504 Exercise. *Cell Metab.* **2018**, *27*, 237-251.e4, doi:10.1016/j.cmet.2017.12.001.
- 505 20. Arraud, N.; Linares, R.; Tan, S.; Gounou, C.; Pasquet, J.M.; Mornet, S.; Brisson, A.R. Extracellular vesicles  
506 from blood plasma: Determination of their morphology, size, phenotype and concentration. *J. Thromb.*

- 507 *Haemost.* **2014**, doi:10.1111/jth.12554.
- 508 21. Berckmans, R.J.; Lacroix, R.; Hau, C.M.; Sturk, A.; Nieuwland, R. Extracellular vesicles and coagulation  
509 in blood from healthy humans revisited. *J. Extracell. Vesicles* **2019**, doi:10.1080/20013078.2019.1688936.
- 510 22. Palviainen, M.; Saraswat, M.; Varga, Z.; Kitka, D.; Neuvonen, M.; Puhka, M.; Joenväärä, S.; Renkonen,  
511 R.; Nieuwland, R.; Takatalo, M.; et al. Extracellular vesicles from human plasma and serum are carriers  
512 of extravesicular cargo—Implications for biomarker discovery. *PLoS One* **2020**, *15*, e0236439,  
513 doi:10.1371/journal.pone.0236439.
- 514 23. Buzás, E.I.; Tóth, E.Á.; Sódar, B.W.; Szabó-Taylor, K.É. Molecular interactions at the surface of  
515 extracellular vesicles. *Semin. Immunopathol.* **2018**, *40*, 453–464, doi:10.1007/s00281-018-0682-0.
- 516 24. Kalluri, R.; LeBleu, V.S. Discovery of Double-Stranded Genomic DNA in Circulating Exosomes. *Cold  
517 Spring Harb. Symp. Quant. Biol.* **2016**, *81*, 275–280, doi:10.1101/sqb.2016.81.030932.
- 518 25. Thakur, B.K.; Zhang, H.; Becker, A.; Matei, I.; Huang, Y.; Costa-Silva, B.; Zheng, Y.; Hoshino, A.; Brazier,  
519 H.; Xiang, J.; et al. Double-stranded DNA in exosomes: a novel biomarker in cancer detection. *Cell Res.*  
520 **2014**, *24*, 766–769, doi:10.1038/cr.2014.44.
- 521 26. Jeppesen, D.K.; Fenix, A.M.; Franklin, J.L.; Higginbotham, J.N.; Zhang, Q.; Zimmerman, L.J.; Liebler,  
522 D.C.; Ping, J.; Liu, Q.; Evans, R.; et al. Reassessment of Exosome Composition. *Cell* **2019**,  
523 doi:10.1016/j.cell.2019.02.029.
- 524 27. Lee, T.H.; Chennakrishnaiah, S.; Audemard, E.; Montermini, L.; Meehan, B.; Rak, J. Oncogenic ras-driven  
525 cancer cell vesiculation leads to emission of double-stranded DNA capable of interacting with target  
526 cells. *Biochem. Biophys. Res. Commun.* **2014**, doi:10.1016/j.bbrc.2014.07.109.
- 527 28. Fischer, S.; Cornils, K.; Speiseder, T.; Badbaran, A.; Reimer, R.; Indenbirken, D.; Grundhoff, A.;  
528 Brunswig-Spickenheier, B.; Alawi, M.; Lange, C. Indication of Horizontal DNA Gene Transfer by  
529 Extracellular Vesicles. *PLoS One* **2016**, *11*, e0163665, doi:10.1371/journal.pone.0163665.
- 530 29. Balaj, L.; Lessard, R.; Dai, L.; Cho, Y.J.; Pomeroy, S.L.; Breakefield, X.O.; Skog, J. Tumour microvesicles  
531 contain retrotransposon elements and amplified oncogene sequences. *Nat. Commun.* **2011**,  
532 doi:10.1038/ncomms1180.
- 533 30. Choi, D.; Montermini, L.; Jeong, H.; Sharma, S.; Meehan, B.; Rak, J. Mapping Subpopulations of Cancer  
534 Cell-Derived Extracellular Vesicles and Particles by Nano-Flow Cytometry. *ACS Nano* **2019**,  
535 doi:10.1021/acsnano.9b04480.
- 536 31. Németh, A.; Orgovan, N.; Sódar, B.W.; Osteikoetxea, X.; Pálóczi, K.; Szabó-Taylor, K.É.; Vukman, K. V.;  
537 Kittel, Á.; Turiák, L.; Wiener, Z.; et al. Antibiotic-induced release of small extracellular vesicles  
538 (exosomes) with surface-associated DNA. *Sci. Rep.* **2017**, *7*, 8202, doi:10.1038/s41598-017-08392-1.
- 539 32. Zhang, H.; Freitas, D.; Kim, H.S.; Fabijanic, K.; Li, Z.; Chen, H.; Mark, M.T.; Molina, H.; Martin, A.B.;  
540 Bojmar, L.; et al. Identification of distinct nanoparticles and subsets of extracellular vesicles by  
541 asymmetric flow field-flow fractionation. *Nat. Cell Biol.* **2018**, *20*, 332–343, doi:10.1038/s41556-018-0040-

- 542 4.
- 543 33. Zhang, Q.; Higginbotham, J.N.; Jeppesen, D.K.; Yang, Y.-P.; Li, W.; McKinley, E.T.; Graves-Deal, R.; Ping,  
544 J.; Britain, C.M.; Dorsett, K.A.; et al. Transfer of Functional Cargo in Exomeres. *Cell Rep.* **2019**, *27*, 940-  
545 954.e6, doi:10.1016/j.celrep.2019.01.009.
- 546 34. Takahashi, A.; Okada, R.; Nagao, K.; Kawamata, Y.; Hanyu, A.; Yoshimoto, S.; Takasugi, M.; Watanabe,  
547 S.; Kanemaki, M.T.; Obuse, C.; et al. Erratum to: Exosomes maintain cellular homeostasis by excreting  
548 harmful DNA from cells (Nature Communications, (2017), 8, (15287), 10.1038/ncomms15287). *Nat.*  
549 *Commun.* 2018.
- 550 35. Allenson, K.; Castillo, J.; San Lucas, F.A.; Scelo, G.; Kim, D.U.; Bernard, V.; Davis, G.; Kumar, T.; Katz,  
551 M.; Overman, M.J.; et al. High prevalence of mutant KRAS in circulating exosome-derived DNA from  
552 early-stage pancreatic cancer patients. *Ann. Oncol.* **2017**, doi:10.1093/annonc/mdx004.
- 553 36. Kahlert, C.; Melo, S.A.; Protopopov, A.; Tang, J.; Seth, S.; Koch, M.; Zhang, J.; Weitz, J.; Chin, L.; Futreal,  
554 A.; et al. Identification of Double-stranded Genomic DNA Spanning All Chromosomes with Mutated  
555 KRAS and p53 DNA in the Serum Exosomes of Patients with Pancreatic Cancer. *J. Biol. Chem.* **2014**, *289*,  
556 3869–3875, doi:10.1074/jbc.C113.532267.
- 557 37. Lázaro-Ibáñez, E.; Lässer, C.; Shelke, G.V.; Crescitelli, R.; Jang, S.C.; Cvjetkovic, A.; García-Rodríguez,  
558 A.; Lötvall, J. DNA analysis of low- and high-density fractions defines heterogeneous subpopulations of  
559 small extracellular vesicles based on their DNA cargo and topology. *J. Extracell. Vesicles* **2019**,  
560 doi:10.1080/20013078.2019.1656993.
- 561 38. Yang, S.; Che, S.P.Y.; Kurywchak, P.; Tavormina, J.L.; Gansmo, L.B.; Correa de Sampaio, P.; Tachezy, M.;  
562 Bockhorn, M.; Gebauer, F.; Haltom, A.R.; et al. Detection of mutant KRAS and TP53 DNA in circulating  
563 exosomes from healthy individuals and patients with pancreatic cancer. *Cancer Biol. Ther.* **2017**, *18*, 158–  
564 165, doi:10.1080/15384047.2017.1281499.
- 565 39. Vagner, T.; Spinelli, C.; Minciacchi, V.R.; Balaj, L.; Zandian, M.; Conley, A.; Zijlstra, A.; Freeman, M.R.;  
566 Demichelis, F.; De, S.; et al. Large extracellular vesicles carry most of the tumour DNA circulating in  
567 prostate cancer patient plasma. *J. Extracell. Vesicles* **2018**, doi:10.1080/20013078.2018.1505403.
- 568 40. Klump, J.; Phillipp, U.; Follo, M.; Eremin, A.; Lehmann, H.; Nestel, S.; von Bubnoff, N.; Nazarenko, I.  
569 Extracellular vesicles or free circulating DNA: where to search for BRAF and cKIT mutations?  
570 *Nanomedicine Nanotechnology, Biol. Med.* **2018**, doi:10.1016/j.nano.2017.12.009.
- 571 41. Helmig, S.; Frühbeis, C.; Krämer-Albers, E.-M.; Simon, P.; Tug, S. Release of bulk cell free DNA during  
572 physical exercise occurs independent of extracellular vesicles. *Eur. J. Appl. Physiol.* **2015**, *115*, 2271–2280,  
573 doi:10.1007/s00421-015-3207-8.
- 574 42. Cai, J.; Guan, W.; Tan, X.; Chen, C.; Li, L.; Wang, N.; Zou, X.; Zhou, F.; Wang, J.; Pei, F.; et al. SRY gene  
575 transferred by extracellular vesicles accelerates atherosclerosis by promotion of leucocyte adherence to  
576 endothelial cells. *Clin. Sci.* **2015**, doi:10.1042/CS20140826.

- 577 43. Fernando, M.R.; Jiang, C.; Krzyzanowski, G.D.; Ryan, W.L. New evidence that a large proportion of  
578 human blood plasma cell-free DNA is localized in exosomes. *PLoS One* **2017**, *12*, e0183915,  
579 doi:10.1371/journal.pone.0183915.
- 580 44. Monguió-Tortajada, M.; Gálvez-Montón, C.; Bayes-Genis, A.; Roura, S.; Borràs, F.E. Extracellular vesicle  
581 isolation methods: rising impact of size-exclusion chromatography. *Cell. Mol. Life Sci.* **2019**, *76*, 2369–  
582 2382, doi:10.1007/s00018-019-03071-y.
- 583 45. Simonsen, J.B. What Are We Looking At? Extracellular Vesicles, Lipoproteins, or Both? *Circ. Res.* **2017**,  
584 *121*, 920–922, doi:10.1161/CIRCRESAHA.117.311767.
- 585 46. Jeppesen, D.K.; Fenix, A.M.; Franklin, J.L.; Higginbotham, J.N.; Zhang, Q.; Zimmerman, L.J.; Liebler,  
586 D.C.; Ping, J.; Liu, Q.; Evans, R.; et al. Reassessment of Exosome Composition. *Cell* **2019**, *177*, 428–445.e18,  
587 doi:10.1016/j.cell.2019.02.029.
- 588 47. Greening, D.W.; Xu, R.; Ji, H.; Tauro, B.J.; Simpson, R.J. A Protocol for Exosome Isolation and  
589 Characterization: Evaluation of Ultracentrifugation, Density-Gradient Separation, and Immunoaffinity  
590 Capture Methods. In *Methods in Molecular Biology*; 2015; pp. 179–209.
- 591 48. Brahmer, A.; Neuberger, E.W.I.; Simon, P.; Krämer-Albers, E.-M. Considerations for the Analysis of  
592 Small Extracellular Vesicles in Physical Exercise. *Front. Physiol.* **2020**, *11*, 1611,  
593 doi:10.3389/fphys.2020.576150.
- 594 49. Ritchie, C. Rating of Perceived Exertion (RPE). *J. Physiother.* **2012**, *58*, 62, doi:10.1016/S1836-  
595 9553(12)70078-4.
- 596 50. Lacroix, R.; Judicone, C.; Poncelet, P.; Robert, S.; Arnaud, L.; Sampol, J.; Dignat-George, F. Impact of pre-  
597 analytical parameters on the measurement of circulating microparticles: towards standardization of  
598 protocol. *J. Thromb. Haemost.* **2012**, *10*, 437–46, doi:10.1111/j.1538-7836.2011.04610.x.
- 599 51. Van Deun, J.; Mestdagh, P.; Agostinis, P.; Akay, Ö.; Anand, S.; Anckaert, J.; Martinez, Z.A.; Baetens, T.;  
600 Beghein, E.; Bertier, L.; et al. EV-TRACK: Transparent reporting and centralizing knowledge in  
601 extracellular vesicle research. *Nat. Methods* 2017.
- 602 52. Neuberger, E.W.I.; Brahmer, A.; Ehlert, T.; Kluge, K.; Philippi, K.F.A.; Boedecker, S.C., Weinmann-  
603 Menke, J.; Simon, P. Validating quantitative PCR assays for cell-free DNA detection without DNA  
604 extraction: Exercise induced kinetics in systemic lupus erythematosus patients. doi:  
605 <https://doi.org/10.1101/2021.01.17.21249972>.
- 606 53. Sumenkova, D. V.; Polyakov, L.M.; Panin, L.E. Plasma Lipoproteins as a Transport Form of Extracellular  
607 DNA. *Bull. Exp. Biol. Med.* **2013**, *154*, 622–623, doi:10.1007/s10517-013-2014-7.
- 608 54. Breitbach, S.; Sterzing, B.; Magallanes, C.; Tug, S.; Simon, P. Direct measurement of cell-free DNA from  
609 serially collected capillary plasma during incremental exercise. *J. Appl. Physiol.* **2014**, *117*, 119–130,  
610 doi:10.1152/japplphysiol.00002.2014.
- 611 55. Tug, S.; Mehdorn, M.; Helmig, S.; Breitbach, S.; Ehlert, T.; Simon, P. Exploring the Potential of Cell-Free-

- 612 DNA Measurements After an Exhaustive Cycle-Ergometer Test as a Marker for Performance-Related  
613 Parameters. *Int. J. Sports Physiol. Perform.* **2017**, *12*, 597–604, doi:10.1123/ijsp.2016-0157.
- 614 56. Napirei, M.; Wulf, S.; Eulitz, D.; Mannherz, H.G.; Kloeckl, T. Comparative characterization of rat  
615 deoxyribonuclease 1 (Dnase1) and murine deoxyribonuclease 1-like 3 (Dnase1l3). *Biochem. J.* **2005**, *389*,  
616 355–64, doi:10.1042/BJ20042124.
- 617 57. Bronkhorst, A.J.; Ungerer, V.; Holdenrieder, S. The emerging role of cell-free DNA as a molecular marker  
618 for cancer management. *Biomol. Detect. Quantif.* **2019**, *17*, 100087, doi:10.1016/j.bdq.2019.100087.
- 619 58. Möller, A.; Lobb, R.J. The evolving translational potential of small extracellular vesicles in cancer. *Nat.*  
620 *Rev. Cancer* 2020.
- 621 59. Kowal, J.; Arras, G.; Colombo, M.; Jouve, M.; Morath, J.P.; Primdal-Bengtson, B.; Dingli, F.; Loew, D.;  
622 Tkach, M.; Théry, C. Proteomic comparison defines novel markers to characterize heterogeneous  
623 populations of extracellular vesicle subtypes. *Proc. Natl. Acad. Sci. U. S. A.* **2016**,  
624 doi:10.1073/pnas.1521230113.
- 625 60. Van Deun, J.; Mestdagh, P.; Sormunen, R.; Cocquyt, V.; Vermaelen, K.; Vandesompele, J.; Bracke, M.; De  
626 Wever, O.; Hendrix, A. The impact of disparate isolation methods for extracellular vesicles on  
627 downstream RNA profiling. *J. Extracell. Vesicles* **2014**, doi:10.3402/jev.v3.24858.
- 628 61. Lobb, R.J.; Becker, M.; Wen, S.W.; Wong, C.S.F.; Wiegmans, A.P.; Leimgruber, A.; Möller, A. Optimized  
629 exosome isolation protocol for cell culture supernatant and human plasma. *J. Extracell. Vesicles* **2015**,  
630 doi:10.3402/jev.v4.27031.
- 631 62. Tandia, B.-M.; Vandenbranden, M.; Wattiez, R.; Lakhdar, Z.; Ruysschaert, J.-M.; Elouahabi, A.  
632 Identification of human plasma proteins that bind to cationic lipid/DNA complex and analysis of their  
633 effects on transfection efficiency: implications for intravenous gene transfer. *Mol. Ther.* **2003**, *8*, 264–273,  
634 doi:10.1016/S1525-0016(03)00150-3.
- 635 63. Qubit® dsDNA HS Assay Kits. Available online: [https://www.thermofisher.com/document-connect/document-connect.html?url=https%3A%2F%2Fassets.thermofisher.com%2FTFS-Assets%2FLSG%2Fmanuals%2FQubit\\_dsDNA\\_HS\\_Assay\\_UG.pdf&title=VXNlciBHdWlkZTogUXViaXQgZHNETkEgSFMgQXNzYXkgS2l0cw==](https://www.thermofisher.com/document-connect/document-connect.html?url=https%3A%2F%2Fassets.thermofisher.com%2FTFS-Assets%2FLSG%2Fmanuals%2FQubit_dsDNA_HS_Assay_UG.pdf&title=VXNlciBHdWlkZTogUXViaXQgZHNETkEgSFMgQXNzYXkgS2l0cw==) (accessed on Jan 27, 2021).
- 639 64. Vechetti, I.J.; Valentino, T.; Mobley, C.B.; McCarthy, J.J. The role of extracellular vesicles in skeletal  
640 muscle and systematic adaptation to exercise. *J. Physiol.* 2020.
- 641 65. Fuller, O.K.; Whitham, M.; Mathivanan, S.; Febbraio, M.A. The Protective Effect of Exercise in  
642 Neurodegenerative Diseases: The Potential Role of Extracellular Vesicles. *Cells* **2020**, *9*, 2182,  
643 doi:10.3390/cells9102182.
- 644 66. Denham, J.; Spencer, S.J. Emerging roles of extracellular vesicles in the intercellular communication for  
645 exercise-induced adaptations. *Am. J. Physiol. Metab.* **2020**, *319*, E320–E329,  
646 doi:10.1152/ajpendo.00215.2020.
